# Supplementary material for: Simulation of ash clouds after a Laacher See-type eruption
Source: Copernicus journal article supplement (doi:10.5194/cp-17-633-2021), 2021-03-11
Supplement: Supplementary file 1 [file cp-17-633-2021-supplement.pdf]

Supplement of *Clim. Past*, 17, 633–652, 2021  
<https://doi.org/10.5194/cp-17-633-2021-supplement>  
© Author(s) 2021. This work is distributed under  
the Creative Commons Attribution 4.0 License.

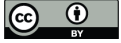

*Supplement of*

## **Simulation of ash clouds after a Laacher See-type eruption**

**Ulrike Niemeier et al.**

*Correspondence to:* Ulrike Niemeier ([ulrike.niemeier@mpimet.mpg.de](mailto:ulrike.niemeier@mpimet.mpg.de))

The copyright of individual parts of the supplement might differ from the CC BY 4.0 License.

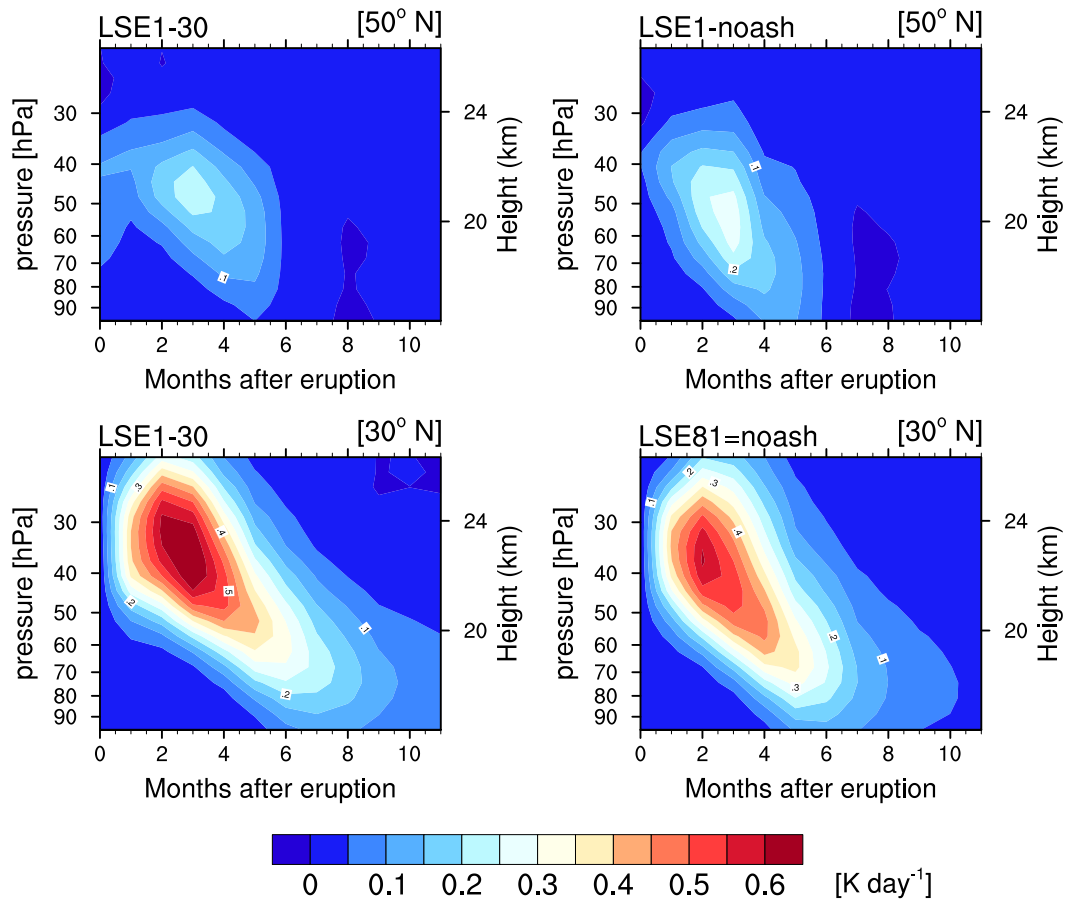

Figure S1: Zonal mean heating rate at 30° N (top) and 50° N (bottom) of LSE-30 (left) and LSE-30-noash (right).

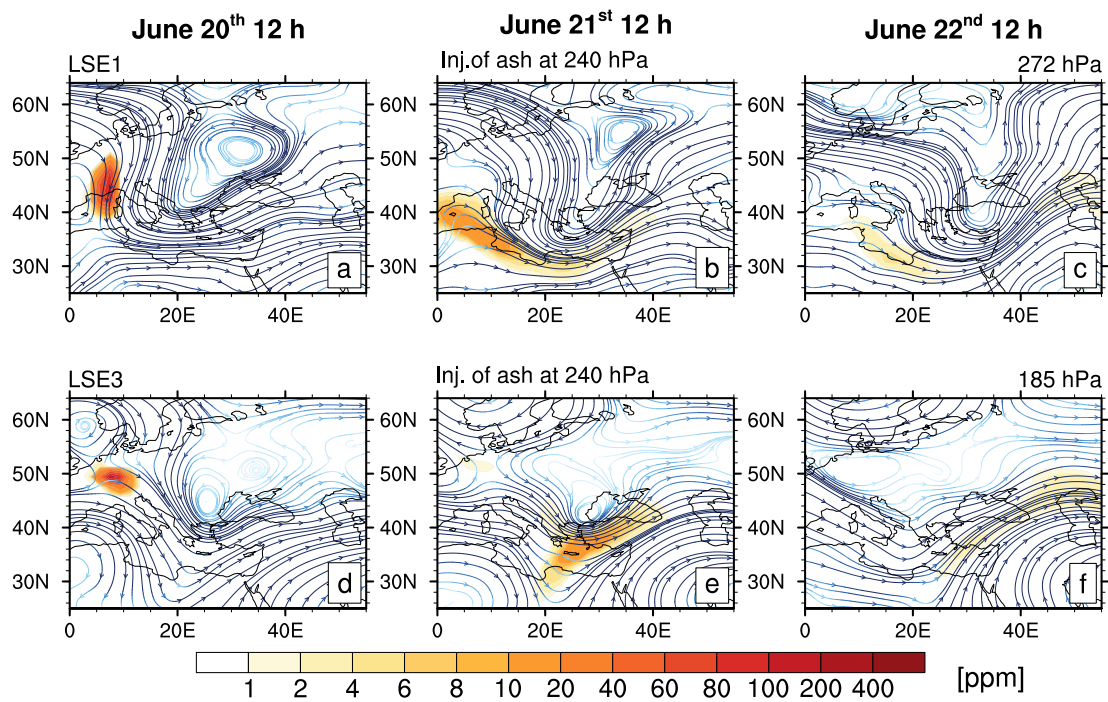

Figure S2: Streamlines of the zonal wind  $\text{m s}^{-1}$  over Europe for LSE-30 at 272 hPa and LSE-100 at 185 hPa at June 20<sup>th</sup>, 21<sup>st</sup> and 22<sup>nd</sup> right after the second eruption phase. The altitude shown is the level with the highest ash concentration over the three days.

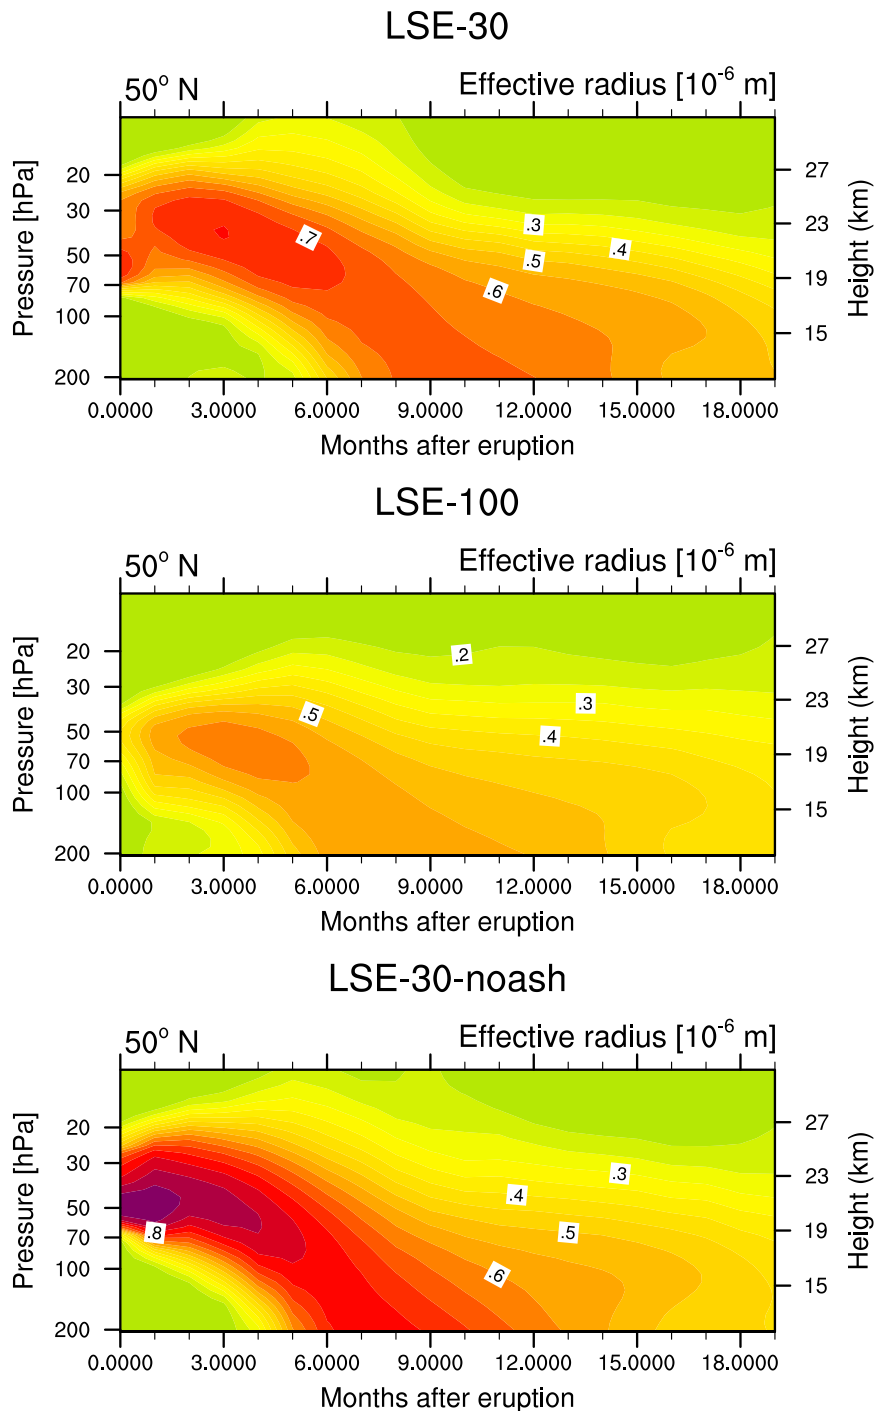

Figure S3: Zonal mean of effective radius  $\mu$  m of sulfate aerosols over time as cross section at 50° N of LSE-30, LSE-100 and LSE-30-noash. Injection at lower latitude (LSE-100) shows smaller radii and the simulation without fine ash (LSE-30-noash) larger radii than LSE-30

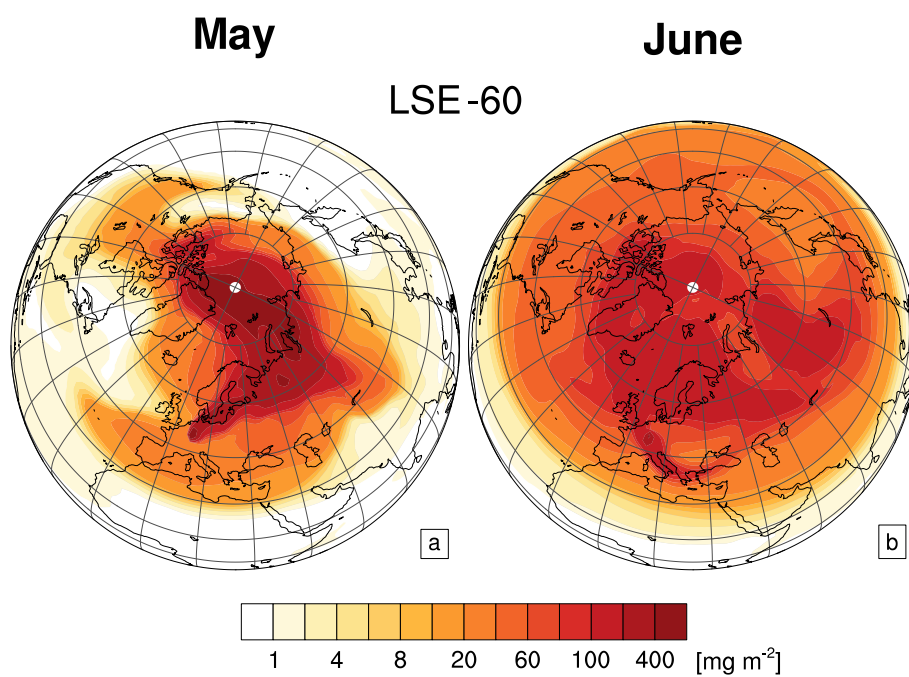

Figure S4: Monthly mean sulfur burden (SO<sub>2</sub> plus sulfate) shortly after the eruption (May, left and June, right) for the scenarios LSE-60.

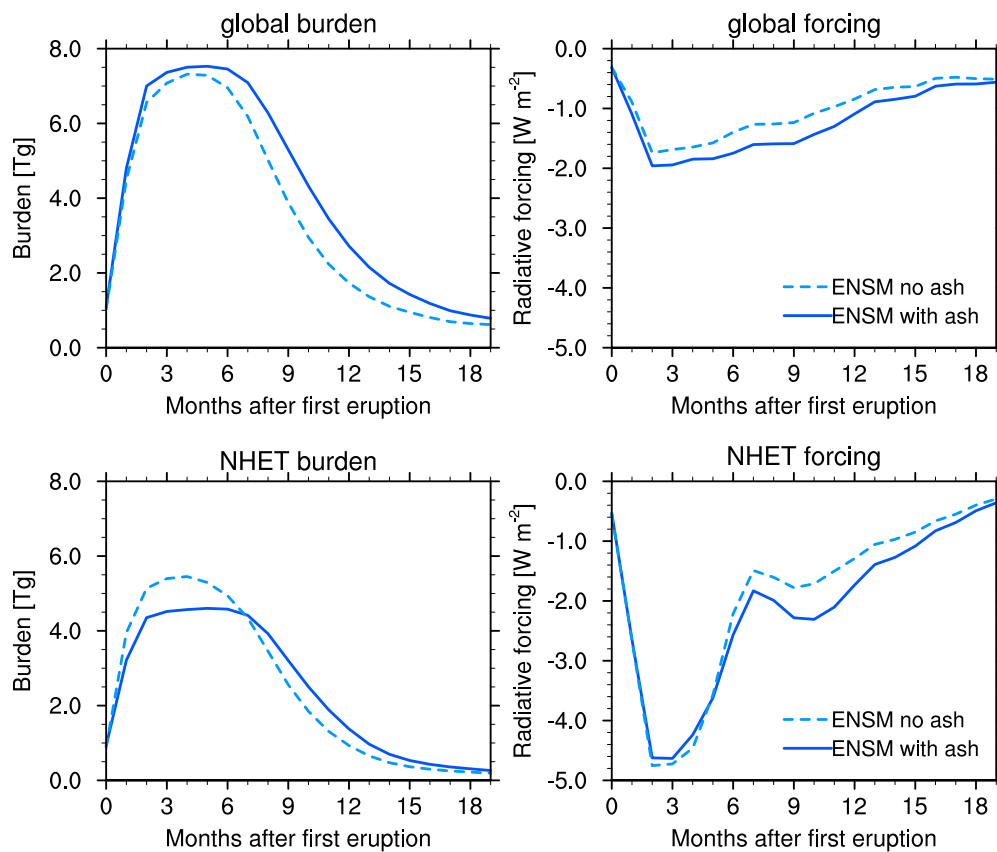

Figure S5: Area average of the ensemble mean of sulfate burden (left) and net radiative forcing (right, all sky, top of atmosphere) of sulfate aerosols over time. Top: Global average. Bottom: averaged over the northern hemisphere extratropics ( $30^\circ$  to  $90^\circ$ N). The ensemble mean was calculated of of simulations with an initial injection of 15 Tg  $\text{SO}_2$  at different eruption days, with injection of fine ash (solid, LSE-30, LSE-30-May15, LSE-30-May22) and without (dashed, LSE-30-noash, LSE-30-May15-noash, LSE-30-May22-noash).

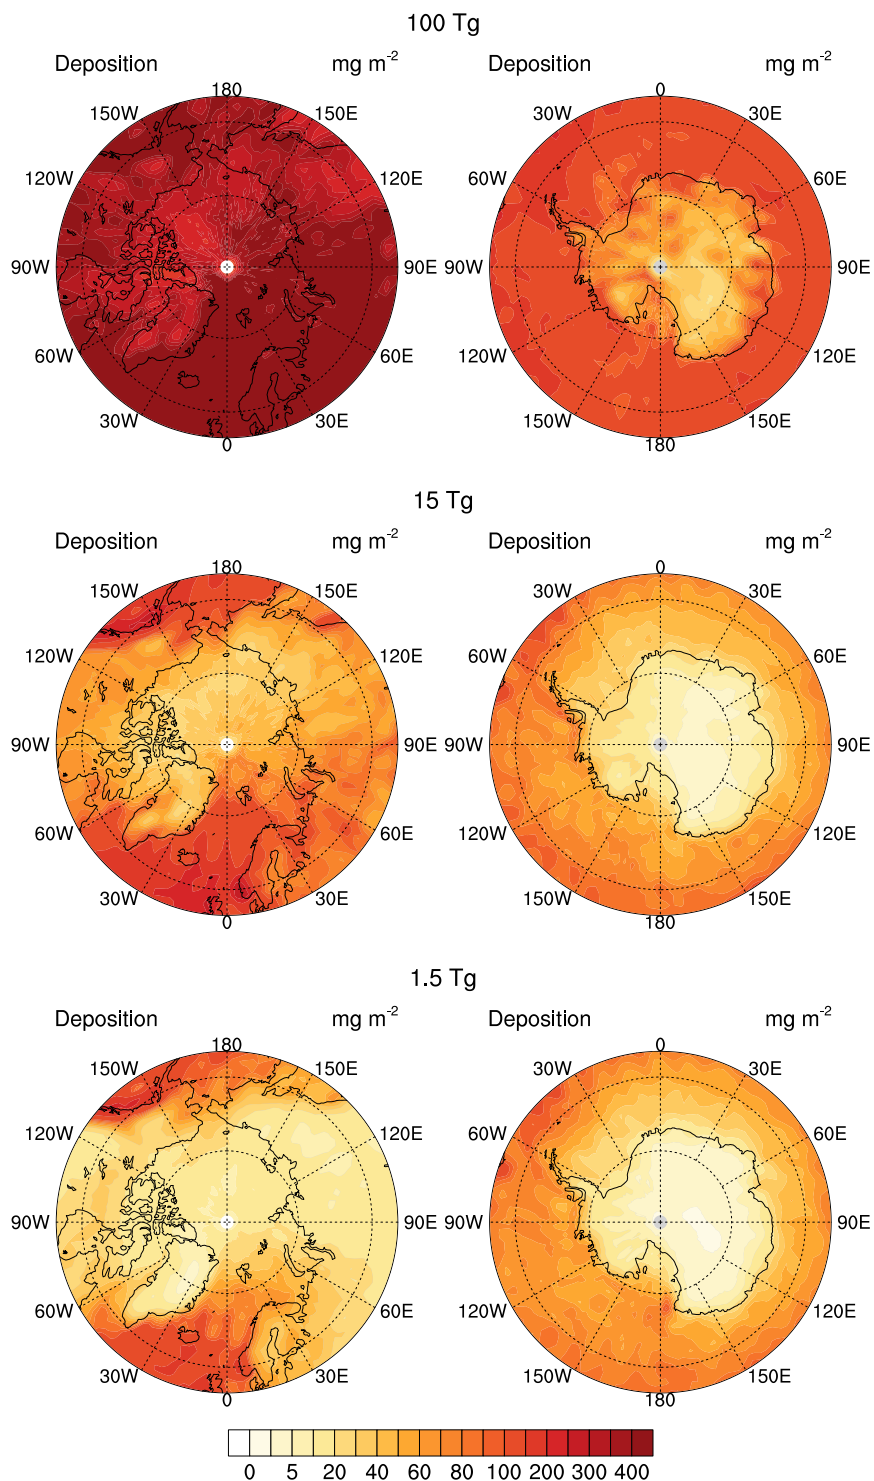

Figure S6: Deposition of simulations with 1.5, 15 and 100 Tg SO<sub>2</sub>. Deposition over central Greenland (70° N to 80° N, 30° W to 50° W) 6.7 mg m<sup>-2</sup>, 40. mg m<sup>-2</sup>, and 300. mg m<sup>-2</sup>. Over Antarctica (75° S to 85° S , 0° to 60° E) roughly 1.8 mg m<sup>-2</sup>, 6. mg,m<sup>-2</sup> and, up to 54 mg m<sup>-2</sup>.
